# Supplementary material
Source: publisher site journal article supplement (https://www.degruyterbrill.com/publication/isbn/9783486599060/downloadAsset/9783486599060_Inhaltsverzeichnis.pdf)
Supplement: Supplementary file 1 [file 9783486599060_Inhaltsverzeichnis.pdf]

## INHALT

|                                                                            |     |                                                                                                    |     |
|----------------------------------------------------------------------------|-----|----------------------------------------------------------------------------------------------------|-----|
| <b>Vorwort</b>                                                             | 7   | <b>4. Mechanische Schwingungen und Wellen</b>                                                      | 119 |
| <b>1. Einleitung</b>                                                       | 11  | 4.1 Lineare Sinus-Schwingung                                                                       | 119 |
| 1.1 Physikalische Größen und ihre Einheiten                                | 11  | 4.2 Drehschwingungen                                                                               | 123 |
| 1.2 Formulierung physikalischer Aussagen                                   | 15  | 4.3 Ungedämpfte und gedämpfte Schwingungen                                                         | 125 |
| 1.3 Physikalische Messungen                                                | 16  | 4.4 Erzwungene Schwingungen – Resonanz                                                             | 126 |
| <b>2. Mechanik fester Körper</b>                                           | 21  | 4.5 Überlagerung von Sinus-Schwingungen                                                            | 127 |
| 2.1 Zusammenstellung einiger Grundkenntnisse                               | 21  | 4.6 Fortschreitende Wellen längs einer linearen<br>Anordnung von Teilchen                          | 128 |
| 2.2 Kinematik der geradlinigen Bewegung eines Massen-<br>punktes           | 23  | 4.7 Wellengleichung für die Ausbreitung von Wellen<br>in festen, flüssigen und gasförmigen Körpern | 132 |
| 2.3 Kinematik der Drehung eines starren Körpers um<br>eine feste Achse     | 27  | 4.8 Fortschreitende Wellen im Raum – Schallwellen                                                  | 135 |
| 2.4 Kinematik der krummlinigen Bewegung eines<br>Massenpunktes             | 30  | 4.9 Stehende Wellen                                                                                | 143 |
| 2.5 Dynamik der Bahnbewegungen                                             | 34  | 4.10 Eigenschwingungen deformierbarer Körper                                                       | 145 |
| 2.6 Bewegungen unter dem Einfluß von Zentralkräften<br>(Zentralbewegungen) | 60  | 4.11 Schallfeld                                                                                    | 150 |
| 2.7 Trägheitskräfte                                                        | 72  | 4.12 Akustik in der Bautechnik                                                                     | 154 |
| 2.8 Dynamik der Drehung eines starren Körpers                              | 79  | 4.13 Ultraschall                                                                                   | 154 |
| 2.9 Deformationen fester Körper                                            | 99  | 4.14 Schallquelle mit Überschallgeschwindigkeit                                                    | 155 |
| <b>3. Mechanik der Flüssigkeiten und Gase</b>                              | 107 | <b>5. Wärmelehre</b>                                                                               | 156 |
| 3.1 Ruhende Flüssigkeiten und Gase – Hydrostatik und<br>Aerostatik         | 107 | 5.1 Zusammenstellung einiger Grundkenntnisse                                                       | 156 |
| 3.2 Strömende Flüssigkeiten und Gase – Hydrodynamik<br>und Aerodynamik     | 111 | 5.2 Kinetische Gastheorie                                                                          | 162 |
|                                                                            |     | 5.3 Erster und zweiter Hauptsatz der Wärmelehre                                                    | 173 |
|                                                                            |     | 5.4 Zustandsänderungen idealer Gase                                                                | 180 |
|                                                                            |     | 5.5 Reale Gase                                                                                     | 191 |
|                                                                            |     | 5.6 Reale Substanzen in verschiedenen Aggregat-<br>zuständen                                       | 196 |
|                                                                            |     | 5.7 Übertragung von Energie durch Wärme                                                            | 201 |
|                                                                            |     | Register                                                                                           | 206 |
